# Supplementary material for: Reducing Communication Delays and Improving Quality of Care with a Tuberculosis Laboratory Information System in Resource Poor Environments: A Cluster Randomized Controlled Trial
Source: PubMed Central journal article supplement (PMC3982951; doi:10.1371/journal.pone.0090110), 2014-04-10
Supplement: pone.0090110.s001.pdf [file pone.0090110.s001.pdf]

# CONSORT checklist

| Section/Topic             | Item No | Checklist item                                                                                                                        | Reported in section       |
|---------------------------|---------|---------------------------------------------------------------------------------------------------------------------------------------|---------------------------|
| <b>Title and abstract</b> |         |                                                                                                                                       |                           |
|                           | 1a      | Identification as a randomised trial in the title                                                                                     | Title                     |
|                           | 1b      | Structured summary of trial design, methods, results, and conclusions (for specific guidance see CONSORT for abstracts)               | Abstract                  |
| <b>Introduction</b>       |         |                                                                                                                                       |                           |
| Background and objectives | 2a      | Scientific background and explanation of rationale                                                                                    | Introduction              |
|                           | 2b      | Specific objectives or hypotheses                                                                                                     | Introduction              |
| <b>Methods</b>            |         |                                                                                                                                       |                           |
| Trial design              | 3a      | Description of trial design (such as parallel, factorial) including allocation ratio                                                  | Study Design              |
|                           | 3b      | Important changes to methods after trial commencement (such as eligibility criteria), with reasons                                    | N/A                       |
| Participants              | 4a      | Eligibility criteria for participants                                                                                                 | Study Population          |
|                           | 4b      | Settings and locations where the data were collected                                                                                  | Randomization and Masking |
| Interventions             | 5       | The interventions for each group with sufficient details to allow replication, including how and when they were actually administered | Intervention              |
| Outcomes                  | 6a      | Completely defined pre-specified primary and secondary outcome measures, including how and when they were assessed                    | Outcomes                  |
|                           | 6b      | Any changes to trial outcomes after the trial commenced, with reasons                                                                 | N/A                       |
| Sample size               | 7a      | How sample size was determined                                                                                                        | Sample Size               |
|                           | 7b      | When applicable, explanation of any interim analyses and stopping guidelines                                                          | N/A                       |
| <b>Randomisation:</b>     |         |                                                                                                                                       |                           |
| Sequence generation       | 8a      | Method used to generate the random allocation sequence                                                                                | Randomization and Masking |

|                                                      |     |                                                                                                                                                                                                            |                           |
|------------------------------------------------------|-----|------------------------------------------------------------------------------------------------------------------------------------------------------------------------------------------------------------|---------------------------|
|                                                      | 8b  | Type of randomisation; details of any restriction (such as blocking and block size)                                                                                                                        | Randomization and Masking |
| Allocation concealment mechanism                     | 9   | Mechanism used to implement the random allocation sequence (such as sequentially numbered containers), describing any steps taken to conceal the sequence until interventions were assigned is this clear? | Randomization and Masking |
| Implementation                                       | 10  | Who generated the random allocation sequence, who enrolled participants, and who assigned participants to interventions                                                                                    | Randomization and Masking |
| Blinding                                             | 11a | If done, who was blinded after assignment to interventions (for example, participants, care providers, those assessing outcomes) and how                                                                   | N/A                       |
|                                                      | 11b | If relevant, description of the similarity of interventions                                                                                                                                                | N/A                       |
| Statistical methods                                  | 12a | Statistical methods used to compare groups for primary and secondary outcomes                                                                                                                              | Statistical Analysis      |
|                                                      | 12b | Methods for additional analyses, such as subgroup analyses and adjusted analyses                                                                                                                           | Statistical Analysis      |
| <b>Results</b>                                       |     |                                                                                                                                                                                                            |                           |
| Participant flow (a diagram is strongly recommended) | 13a | For each group, the numbers of participants who were randomly assigned, received intended treatment, and were analysed for the primary outcome                                                             | Results                   |
|                                                      | 13b | For each group, losses and exclusions after randomisation, together with reasons                                                                                                                           | Results                   |
| Recruitment                                          | 14a | Dates defining the periods of recruitment and follow-up                                                                                                                                                    | Data Abstraction          |
|                                                      | 14b | Why the trial ended or was stopped                                                                                                                                                                         | N/A                       |
| Baseline data                                        | 15  | A table showing baseline demographic and clinical characteristics for each group                                                                                                                           | Table 2                   |
| Numbers analysed                                     | 16  | For each group, number of participants (denominator) included in each analysis and whether the analysis was by original assigned groups                                                                    | Table 2                   |
| Outcomes and estimation                              | 17a | For each primary and secondary outcome, results for each group, and the estimated effect size and its precision (such as 95% confidence interval)                                                          | Table 3                   |
|                                                      | 17b | For binary outcomes, presentation of both absolute and relative effect sizes is recommended                                                                                                                | Table 3                   |
| Ancillary analyses                                   | 18  | Results of any other analyses performed, including subgroup analyses and adjusted analyses, distinguishing pre-specified from exploratory                                                                  | N/A                       |
| Harms                                                | 19  | All important harms or unintended effects in each group (for specific guidance see CONSORT for harms)                                                                                                      | N/A                       |

---

|                          |    |                                                                                                                  |                  |
|--------------------------|----|------------------------------------------------------------------------------------------------------------------|------------------|
| <b>Discussion</b>        |    |                                                                                                                  |                  |
| Limitations              | 20 | Trial limitations, addressing sources of potential bias, imprecision, and, if relevant, multiplicity of analyses | Discussion       |
| Generalisability         | 21 | Generalisability (external validity, applicability) of the trial findings                                        | Discussion       |
| Interpretation           | 22 | Interpretation consistent with results, balancing benefits and harms, and considering other relevant evidence    | Discussion       |
| <hr/>                    |    |                                                                                                                  |                  |
| <b>Other information</b> |    |                                                                                                                  |                  |
| Registration             | 23 | Registration number and name of trial registry                                                                   | Methods          |
| Protocol                 | 24 | Where the full trial protocol can be accessed, if available                                                      | N/A              |
| Funding                  | 25 | Sources of funding and other support (such as supply of drugs), role of funders                                  | Acknowledgements |

---
